# Supplementary material for: Validation of the Portuguese Version of the Short-Form Glasgow Composite Measure Pain Scale (CMPS-SF) According to COSMIN and GRADE Guidelines
Source: MDPI journal article supplement (doi:10.3390/ani14060831), 2024-03-08
Supplement: s1 [file s1]

**Supplementary 1.** Psychometric score of GRADE adapted [14, 15] to test the properties of the CMPS-SF [10]

| Questions                                                                              | Subtitle score                                                                                                                                                                                                                                                                                         | CMPS-SF [10] | CMPS-SF - Current study |
|----------------------------------------------------------------------------------------|--------------------------------------------------------------------------------------------------------------------------------------------------------------------------------------------------------------------------------------------------------------------------------------------------------|--------------|-------------------------|
| <b>Scale development: item selection and content validation</b>                        |                                                                                                                                                                                                                                                                                                        |              |                         |
| <b>1.1. Was the process of item selection described?</b>                               | 2: Scale was developed for a specific population, using a theoretical or conceptual framework, or a qualitative approach was used (e.g., consultation with clinicians or patients)<br>1: Scale was developed based on the literature review only<br>0: No information is provided about item selection | 2            | 2                       |
| <b>1.2. Was content evaluated by experts? (content validation)</b>                     | 2: Content was evaluated by experts in the field, a Delphi technique may have been used, and Content Validity Index (CVI) were calculated for each item included in the scale<br>1: Content was evaluated by experts, but no CVI is reported<br>0: No information is provided about content validation | 1            | 1                       |
| <b>1.3. Are limitations of some items presented or discussed?</b>                      | 1: No limitations or if any limitations, they are presented and item modifications have been made or precautions have been stated<br>0: No information is provided                                                                                                                                     | 1            | 1                       |
| <b>Subtotal-Scale Development (0 – 5)</b>                                              |                                                                                                                                                                                                                                                                                                        | 4/5          | 4/5                     |
| <b>Subtotal weighted score — Scale development (0–2)</b>                               |                                                                                                                                                                                                                                                                                                        | 1.6          | 1.6                     |
| <b>Scale testing-reliability</b>                                                       |                                                                                                                                                                                                                                                                                                        |              |                         |
| <b>2.1. Was internal consistency of the scale calculated?</b>                          | 2: $0.70 < \alpha < 0.90$<br>1: $0.60 < \alpha < 0.70$ or $\alpha > 0.90$<br>0: $\alpha < 0.60$ or no information provided                                                                                                                                                                             | 0            | 2 ( $\alpha = 0.7$ )    |
| <b>2.2. Was interrater reliability calculated?</b>                                     | 2: $\kappa > 0.60$ or $ICC > 0.80$<br>1: $0.60 < \kappa > 0.40$ or $0.60 < ICC < 0.80$<br>0: $\kappa < 0.40$ , $ICC < 0.60$ or no information provided                                                                                                                                                 | 1            | 2 ( $ICC \geq 0.8$ )    |
| <b>2.3. Was interrater reliability tested with other raters besides research team?</b> | 1: Other raters then research staff members were involved                                                                                                                                                                                                                                              | 1            | 1                       |

|                                                                                                                                                                                                                                               |                                                                                                                                                                                                 |             |                                                              |
|-----------------------------------------------------------------------------------------------------------------------------------------------------------------------------------------------------------------------------------------------|-------------------------------------------------------------------------------------------------------------------------------------------------------------------------------------------------|-------------|--------------------------------------------------------------|
|                                                                                                                                                                                                                                               | 0: Only research staff members were involved                                                                                                                                                    |             |                                                              |
| <b>2.4. Was intrarater reliability tested? Optional—to be examined if ICC &lt; 0.80 for interrater reliability</b>                                                                                                                            | 2: kappa > 0.60 or ICC > 0.80<br>1: 0.60 < kappa > 0.40 or 0.60 < ICC < 0.80<br>0: kappa < 0.40, ICC < 0.60 or no information provided                                                          | 0           | 2 (ICC ≥ 0.8)                                                |
| <b>Subtotal—Scale development (0–5 or 0–7 if intrarater reliability testing required)</b>                                                                                                                                                     |                                                                                                                                                                                                 | <b>2/7</b>  | <b>7/7</b>                                                   |
| <b>Subtotal weighted score—Scale development (0–6)</b>                                                                                                                                                                                        |                                                                                                                                                                                                 | <b>1.68</b> | <b>6</b>                                                     |
| <b>Scale testing: Construct validity</b>                                                                                                                                                                                                      |                                                                                                                                                                                                 |             |                                                              |
| <b>3.1. What is the total of participants for the purpose of testing the scale?</b>                                                                                                                                                           | 2 – N > 50<br>1 – 20 > N < 50<br>0 – N < 20                                                                                                                                                     | 0           | 0                                                            |
| <b>3.2. Criterion validation: Was the scale correlated with the “gold standard: measure renowned in the field of interest (e.g., the patient’s self-report of pain)?</b>                                                                      | 2: r > 0.60 with the “gold standard” measure<br>1: 0.40 < r < 0.60<br>0: r < 0.40 or no information provided                                                                                    | 0           | 2<br>(Unidimensional scales were considered "gold standard") |
| <b>3.3. Criterion validation: Was the sensitivity of the scale calculated?</b>                                                                                                                                                                | 2: Sensitivity ≥ 80%<br>1: 60% Sensitivity < 80%<br>0: Sensitivity < 60% or no information provided                                                                                             | 2           | 1                                                            |
| <b>3.4. Criterion validation: Was the specificity of the scale calculated?</b>                                                                                                                                                                | 2: Specificity ≥ 80%<br>1: 60% ≤ Specificity < 80%<br>0: Specificity < 60% or no information provided                                                                                           | 2           | 2                                                            |
| <b>3.5. Discriminant validation: Was the scale able to discriminate between different situations (e.g., between pain and no pain, e.g., at rest and during a nociceptive procedure, before and after the administration of an analgesic)?</b> | 2: A clinically important difference was found<br>1: A difference was found but was not considered clinically important<br>0: No difference was found or no information is provided             | 2           | 2                                                            |
| <b>Subtotal—Scale development (0–10)</b>                                                                                                                                                                                                      |                                                                                                                                                                                                 | <b>6/10</b> | <b>7/10</b>                                                  |
| <b>Subtotal weighted score—Scale development (0–8)</b>                                                                                                                                                                                        |                                                                                                                                                                                                 | <b>4.8</b>  | <b>5.6</b>                                                   |
| <b>4.1. Was the feasibility (i.e., ease of usage with which clinicians can apply the instrument in the clinical setting) of the scale examined?</b>                                                                                           | 1: Scale is considered to be feasible to use by more than 80% of the clinicians<br>0: Scale is considered to be complex to use by more than 20% of the clinicians or no information is provided | 1           | 0                                                            |

|                                                                                                          |                                                                                                                                                                                                                                                                                                                                                                                                                                       |             |             |
|----------------------------------------------------------------------------------------------------------|---------------------------------------------------------------------------------------------------------------------------------------------------------------------------------------------------------------------------------------------------------------------------------------------------------------------------------------------------------------------------------------------------------------------------------------|-------------|-------------|
| <b>4.2. Are directives of use of the scale clearly described?</b>                                        | 1: Yes, directives of use including the scoring method are described 0: No information about directives of use is provided                                                                                                                                                                                                                                                                                                            | 1           | 0           |
| <b>Subtotal – Scale development (0–2)</b>                                                                |                                                                                                                                                                                                                                                                                                                                                                                                                                       | 2/2         | 0/2         |
| <b>Subtotal weighted score – Scale development (0–2)</b>                                                 |                                                                                                                                                                                                                                                                                                                                                                                                                                       | 2           | 0           |
| <b>5.1. Was the relevance of the scale or impact of its implementation in patient outcomes examined?</b> | 1: Scale is considered to be useful and relevant to practice by more than 80% of the clinicians; use of the scale yielded a significant change into practice (e.g., better use of medication, increase in patients' assessments)<br>0: Scale is not considered to be useful and relevant to practice by more than 20% of the clinicians; use of the scale did not yield a significant change into practice or no information provided | 1           | 0           |
| <b>Subtotal – Scale development (0–1)</b>                                                                |                                                                                                                                                                                                                                                                                                                                                                                                                                       | 0/1         | 0/1         |
| <b>Subtotal weighted score – Scale development (0–2)</b>                                                 |                                                                                                                                                                                                                                                                                                                                                                                                                                       | 0           | 0           |
| <b>Total score (0–25)</b>                                                                                |                                                                                                                                                                                                                                                                                                                                                                                                                                       | 14          | 18          |
| <b>Weighted score (0–20)</b>                                                                             |                                                                                                                                                                                                                                                                                                                                                                                                                                       | <b>11.2</b> | <b>14.4</b> |
| <b>Quality of evidence</b>                                                                               |                                                                                                                                                                                                                                                                                                                                                                                                                                       | Moderate    | Good        |

Interpretation: Weighting scores 15 a 20 – Very good; 12 – 14,9 – good; 10-11.9 – Moderated; 0 – 9.9 – Few/unacceptable properties. Scales with weighting  $\geq 12$  showed greater validity and reliability
