# Supplementary material for: Validation of the Portuguese Version of the Short-Form Glasgow Composite Measure Pain Scale (CMPS-SF) According to COSMIN and GRADE Guidelines
Source: MDPI journal article supplement (doi:10.3390/ani14060831), 2024-03-08
Supplement: s1 [file s1]

FORMULÁRIO RESUMIDO DA ESCALA DE DOR COMPOSTA  
DE GLASGOW

Nome do cão \_\_\_\_\_

Número do hospital \_\_\_\_\_ Data     /     /     Hora

Cirurgia Sim/Não (eliminar se necessário)

Procedimento ou doença \_\_\_\_\_

*Nas seções abaixo, circular a pontuação apropriada em cada lista e some-as para obter a pontuação total.*

**A. Observe o cão de fora do canil**

*Como está o cão?*

| (i)                    |   | (ii)                                       |   |
|------------------------|---|--------------------------------------------|---|
| Quieto                 | 0 | Ignorando qualquer ferida ou área dolorida | 0 |
| Chorando ou lamuriando | 1 | Olhando para a ferida ou área dolorida     | 1 |
| Gemendo                | 2 | Lambendo a ferida ou a área dolorida       | 2 |
| Gritando               | 3 | Esfregando a ferida ou a área dolorida     | 3 |
|                        |   | Mordendo a ferida ou área dolorida         | 4 |

No caso de fraturas da coluna vertebral, pélvicas ou de múltiplos membros, ou quando for necessária assistência para auxiliar a locomoção, não avaliar a seção B e prosseguir para a seção C. Marque se este for o caso ☐ e depois siga para a C.

**B. Coloque a guia no cão e retire-o do canil.**

*Quando o cão se levanta/caminha, ele parece...*

| (iii)                 |   |
|-----------------------|---|
| Normal                | 0 |
| Manco                 | 1 |
| Lento ou relutante    | 2 |
| Rijo                  | 3 |
| Relutante em mover-se | 4 |

**C. Se tiver uma ferida ou área dolorida, incluindo o abdômen, aplique uma pressão suave ao redor (5 cm) do local.**

*Ao ser tocado, o cão...*

| (iv)                      |   |
|---------------------------|---|
| Não tem reação            | 0 |
| Olha ao redor             | 1 |
| Esquiva                   | 2 |
| Rosna ou protege a ferida | 3 |
| Morde                     | 4 |
| Chora                     | 5 |

**D. Geral**

*Como está o cão?*

| (v)                                    |   |
|----------------------------------------|---|
| Feliz e contente ou feliz e animado    | 0 |
| Quieto                                 | 1 |
| Indiferente ou impassível ao ambiente  | 2 |
| Nervoso, ansioso ou com medo           | 3 |
| Deprimido ou indiferente à estimulação | 4 |

*Como está o cão?*

| (vi)               |   |
|--------------------|---|
| Confortável        | 0 |
| Ansioso/inquieto   | 1 |
| Agitado            | 2 |
| Encolhido ou tenso | 3 |
| Rijo               | 4 |
