# Supplementary material for: Validation of the Portuguese Version of the Short-Form Glasgow Composite Measure Pain Scale (CMPS-SF) According to COSMIN and GRADE Guidelines
Source: MDPI journal article supplement (doi:10.3390/ani14060831), 2024-03-08
Supplement: s1 [file s1]

**Table S1.** Interobserver reliability of four evaluators for indication of RA, unidimensional scales (VAS, NRS, and SDS), and composite pain scales in dogs (CMPS-SF), obtained by analyzing 208 videos from four perioperative moments (M1, M2, M3, and M4) of dogs undergoing orthopedic (n = 20) or soft tissue surgeries (n = 22) and negative control group (n = 10), between two phases, 21 days apart.

| Statistical test   | Variables                   | PhD student x<br>Ethologist       | PhD student x<br>MSc student      | PhD student x<br>Student          | Ethologist x<br>MSc student       | Ethologist x<br>Student           | MSc student x<br>Student          |
|--------------------|-----------------------------|-----------------------------------|-----------------------------------|-----------------------------------|-----------------------------------|-----------------------------------|-----------------------------------|
| <b>Kw (CI95%)</b>  | Analgesic rescue            | <b>0.6</b><br><b>(0.52-0.68)</b>  | <b>0.53</b><br><b>(0.45-0.61)</b> | <b>0.51</b><br><b>(0.42-0.6)</b>  | 0.42<br>(0.34-0.51)               | <b>0.54</b><br><b>(0.46-0.62)</b> | 0.4<br>(0.31-0.5)                 |
|                    | Numerical rating scale      | 0.45<br>(0.38-0.52)               | <b>0.6</b><br><b>(0.54-0.66)</b>  | 0.41<br>(0.34-0.49)               | 0.29<br>(0.22-0.36)               | <b>0.68</b><br><b>(0.52-0.67)</b> | 0.29<br>(0.22-0.36)               |
|                    | Simples descriptive scale   | <b>0.52</b><br><b>(0.43-0.6)</b>  | <b>0.54</b><br><b>(0.47-0.61)</b> | <b>0.53</b><br><b>(0.45-0.61)</b> | 0.33<br>(0.24-0.41)               | <b>0.6</b><br><b>(0.52-0.67)</b>  | 0.39<br>(0.31-0.46)               |
| <b>ICC (CI95%)</b> | Visual analogue scale       | <b>0.71</b><br><b>(0.65-0.76)</b> | <b>0.77</b><br><b>(0.72-0.81)</b> | <b>0.7</b><br><b>(0.58-0.72)</b>  | 0.36<br>(0.3-0.45)                | <b>0.75</b><br><b>(0.69-0.79)</b> | <b>0.64</b><br><b>(0.56-0.7)</b>  |
| <b>Kw (CI95%)</b>  | A(i) – Spontaneous behavior | <b>0.58</b><br><b>(0.46-0.69)</b> | <b>0.53</b><br><b>(0.41-0.63)</b> | <b>0.52</b><br><b>(0.4-0.63)</b>  | <b>0.52</b><br><b>(0.43-0.59)</b> | <b>0.56</b><br><b>(0.43-0.68)</b> | <b>0.56</b><br><b>(0.47-0.64)</b> |
|                    | A(ii) – Attention to wound  | <b>0.59</b><br><b>(0.4-0.74)</b>  | 0.37<br>(0.21-0.55)               | 0.32<br>(0.11-0.53)               | 0.46<br>(0.28-0.6)                | 0.56<br>(0.27-0.77)               | 0.3<br>(0.13-0.47)                |
|                    | B (iii) – Mobility          | <b>0.6</b><br><b>(0.5-0.68)</b>   | <b>0.62</b><br><b>(0.51-0.71)</b> | 0.46<br>(0.34-0.57)               | <b>0.52</b><br><b>(0.4-0.63)</b>  | <b>0.71</b><br><b>(0.58-0.81)</b> | 0.46<br>(0.33-0.59)               |
|                    | C (iv) – Response to touch  | <b>0.65</b><br><b>(0.55-0.73)</b> | <b>0.77</b><br><b>(0.69-0.83)</b> | <b>0.76</b><br><b>(0.69-0.84)</b> | <b>0.72</b><br><b>(0.63-0.79)</b> | <b>0.74</b><br><b>(0.66-0.82)</b> | <b>0.83</b><br><b>(0.76-0.88)</b> |
|                    | D (v) – Demeanor            | 0.28<br>(0.2-0.36)                | 0.48<br>(0.39-0.56)               | <b>0.54</b><br><b>(0.47-0.6)</b>  | 0.34<br>(0.26-0.43)               | 0.27<br>(0.19-0.35)               | <b>0.52</b><br><b>(0.43-0.6)</b>  |
|                    | D (vi) – Posture            | 0.41<br>(0.32-0.49)               | 0.37<br>(0.29-0.46)               | 0.29<br>(0.19-0.4)                | 0.31<br>(0.21-0.4)                | 0.39<br>(0.28-0.49)               | 0.33<br>(0.22-0.43)               |
| <b>ICC (CI95%)</b> | <b>Total CMPS-SF</b>        | <b>0.8</b><br><b>(0.76-0.83)</b>  | <b>0.83</b><br><b>(0.8-0.86)</b>  | <b>0.8</b><br><b>(0.77-0.85)</b>  | <b>0.78</b><br><b>(0.73-0.81)</b> | <b>0.82</b><br><b>(0.78-0.85)</b> | <b>0.83</b><br><b>(0.79-0.86)</b> |

Interpretation: 0.81-1.0 very good; 0.61-0.80 good; 0.41-0.60 moderate; 0.21-0.40 reasonable; <0.20 poor [35]. CMPS-SF is Short-Form Composite Pain Score [10], Kw is Weighted Kappa Coefficient, ICC is Intraclass Correlation Coefficient, [CI95% (Min-Max): 95% confidence interval (minimum-maximum values)]. In bold are the values considered acceptable by the adapted GRADE criteria [14,15].
