# Supplementary material for: Validation of the Portuguese Version of the Short-Form Glasgow Composite Measure Pain Scale (CMPS-SF) According to COSMIN and GRADE Guidelines
Source: MDPI journal article supplement (doi:10.3390/ani14060831), 2024-03-08
Supplement: s1 [file s1]

# CERTIFICATE

We hereby certify that the translation from English into Portuguese (Brazil) of the document "Glasgow Dog Scale.docx" has been carried out in accordance with **UNE EN 15038:2006** (European standard for provision of translation services).

Mondo Agit LLC

By:  
Name: Jacobo Guzmán  
Title: Senior Project Manager  
Date: 1 June 2023
