# Supplementary material for: Validation of the Portuguese Version of the Short-Form Glasgow Composite Measure Pain Scale (CMPS-SF) According to COSMIN and GRADE Guidelines
Source: MDPI journal article supplement (doi:10.3390/ani14060831), 2024-03-08
Supplement: s1 [file s1]

**Supplementary 5.** Demographic description of the dogs in the control (n = 10), orthopedic (n = 20) and soft tissue (n = 22) groups.

| <b>Animal</b> | <b>Group</b> | <b>Breed</b>  | <b>Name</b> | <b>Surgical intervention</b>        |
|---------------|--------------|---------------|-------------|-------------------------------------|
| 1             | OG           | Pug           | Udy         | Colocephalectomy R                  |
| 2             | OG           | Cross breed   | Scooby      | Osteosynthesis R/U R                |
| 3             | OG           | Lhasa apso    | Batatinha   | Colocephalectomy R                  |
| 4             | OG           | Cross breed   | Jack        | Patelopexy L                        |
| 5             | OG           | Lhasa         | Pidi        | Patelopexy R                        |
| 6             | OG           | Cross breed   | Titio       | Tibial Osteosynthesis R             |
| 7             | OG           | Cross breed   | Diogo       | Umeral osteosynthesis R             |
| 8             | OG           | Cross breed   | Pingo       | Tibial Osteosynthesis L             |
| 9             | OG           | Cross breed   | Frida       | Elbow arthrodesis L                 |
| 10            | OG           | Cross breed   | Pelé        | Carpal arthrodesis R                |
| 11            | OG           | Pitbull       | Meg         | Colocephalectomy R                  |
| 12            | OG           | Cross breed   | Toddy       | Ileo-femoral suture R               |
| 13            | OG           | Pequinês      | Topêra      | Trochleoplasty R                    |
| 14            | OG           | Cross breed   | Meg         | Femoral osteosynthesis R            |
| 15            | OG           | Cross breed   | Maisena     | Trochleoplasty L                    |
| 16            | OG           | Cross breed   | Nina        | Tibial Osteosynthesis R             |
| 17            | OG           | Cross breed   | Madruginha  | Colocephalectomy L                  |
| 18            | OG           | Pitbull       | Duque       | Metatarsal-phalangeal arthrodesis R |
| 19            | OG           | Pinscher      | Chiquinho   | Colocephalectomy L                  |
| 20            | OG           | Poodle        | Meg         | Osteosynthesis de R/U R             |
| 21            | STG          | Pinscher      | Mimosa      | Mastectomy and OVH                  |
| 22            | STG          | Pitbull       | Pedrita     | OVH                                 |
| 23            | STG          | Cross breed   | Sky         | OVH                                 |
| 24            | STG          | Cross breed   | Lilica      | Mastectomy and OVH                  |
| 25            | STG          | Pitbull       | Athena      | OVH                                 |
| 26            | STG          | Lhasa apso    | Nick        | Cystotomy                           |
| 27            | STG          | Doberman      | Dara        | Mastectomy and OVH                  |
| 28            | STG          | Poodle        | Marie       | Mastectomy and OVH                  |
| 29            | STG          | Border collie | Jade        | OVH                                 |
| 30            | STG          | York          | Cindy       | Cystotomy                           |
| 31            | STG          | Cross breed   | Jack        | Orchiectomy                         |
| 32            | STG          | Rottweiler    | Alexia      | Mastectomy                          |
| 33            | STG          | Cross breed   | Amarelo     | Orchiectomy                         |
| 34            | STG          | Cross breed   | Poka Sombra | Exploratory laparotomy              |
| 35            | STG          | Pitbull       | Balada      | OVH                                 |
| 36            | STG          | Teckel        | Neneca      | Mastectomy and OVH                  |
| 37            | STG          | Pitbull       | Tranquera   | Mastectomy and OVH                  |
| 38            | STG          | Poodle        | Luna        | Mastectomy                          |
| 39            | STG          | Cross breed   | Marrom      | Orchiectomy                         |
| 40            | STG          | Poodle        | Pitty       | Mastectomy                          |
| 41            | STG          | Cross breed   | Lily        | Flap and dermal graft               |

|    |     |               |          |                    |
|----|-----|---------------|----------|--------------------|
| 42 | STG | Cross breed   | Tuti     | Mastectomy and OVH |
| 43 | CG  | Cross breed   | Alvorada | Controll           |
| 44 | CG  | Cross breed   | Remela   | Controll           |
| 45 | CG  | Border collie | Ayka     | Controll           |
| 46 | CG  | Pitbull       | Chayra   | Controll           |
| 47 | CG  | Lhasa apso    | Alvin    | Controll           |
| 48 | CG  | Akita         | Athena   | Controll           |
| 49 | CG  | Cocker        | Coisinha | Controll           |
| 50 | CG  | Cross breed   | Lara     | Controll           |
| 51 | CG  | York          | Mel      | Controll           |
| 52 | CG  | Cross breed   | Milka    | Controll           |

Interpretation: CG is Control group, OG is orthopedic group, STG is soft tissue group, R is right side and L is left side and OVH is ovariosalpingohysterectomy.
